# Supplementary material
Source: bioRxiv or medRxiv preprint supplement (https://www.biorxiv.org/highwire/filestream/75917/field_highwire_adjunct_files/2/230433-3.pdf)

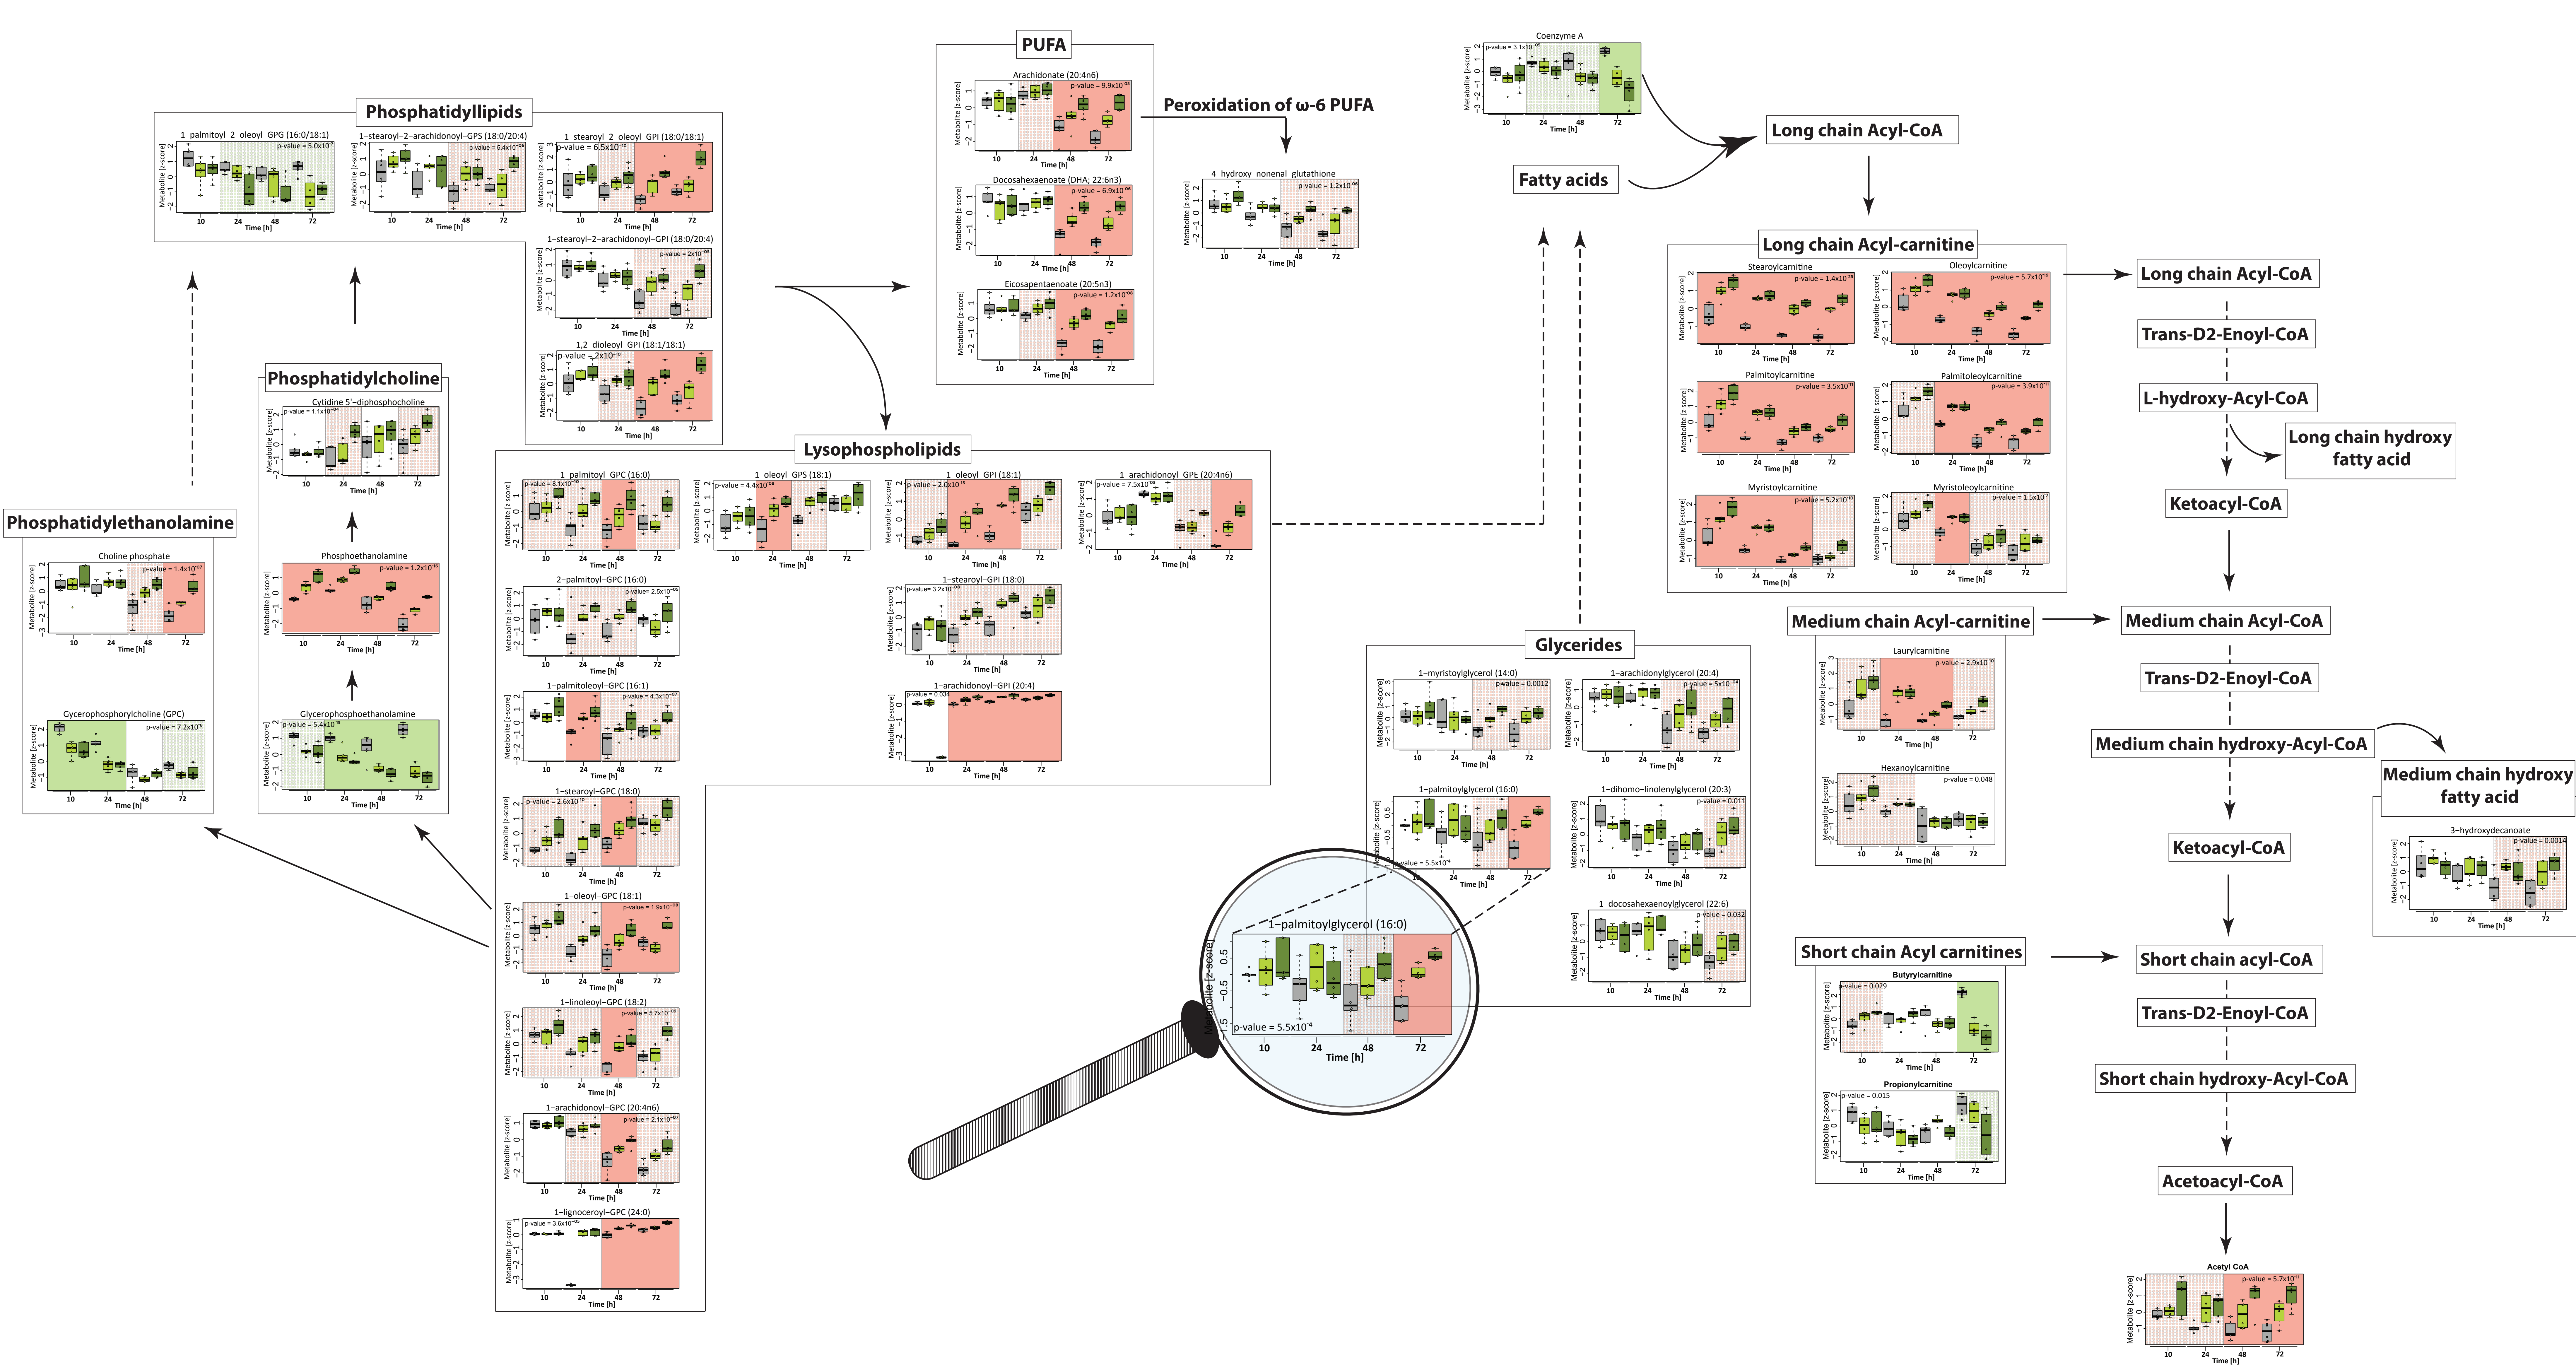

Supplement: Supplementary file [file 230433-3.pdf]
